# Supplementary material for: Anti-Inflammatory Performance of Lactose-Modified Chitosan and Hyaluronic Acid Mixtures in an In Vitro Macrophage-Mediated Inflammation Osteoarthritis Model
Source: MDPI journal article supplement (doi:10.3390/cells9061328), 2020-05-26
Supplement: s1 [file s1]

## Supplementary files

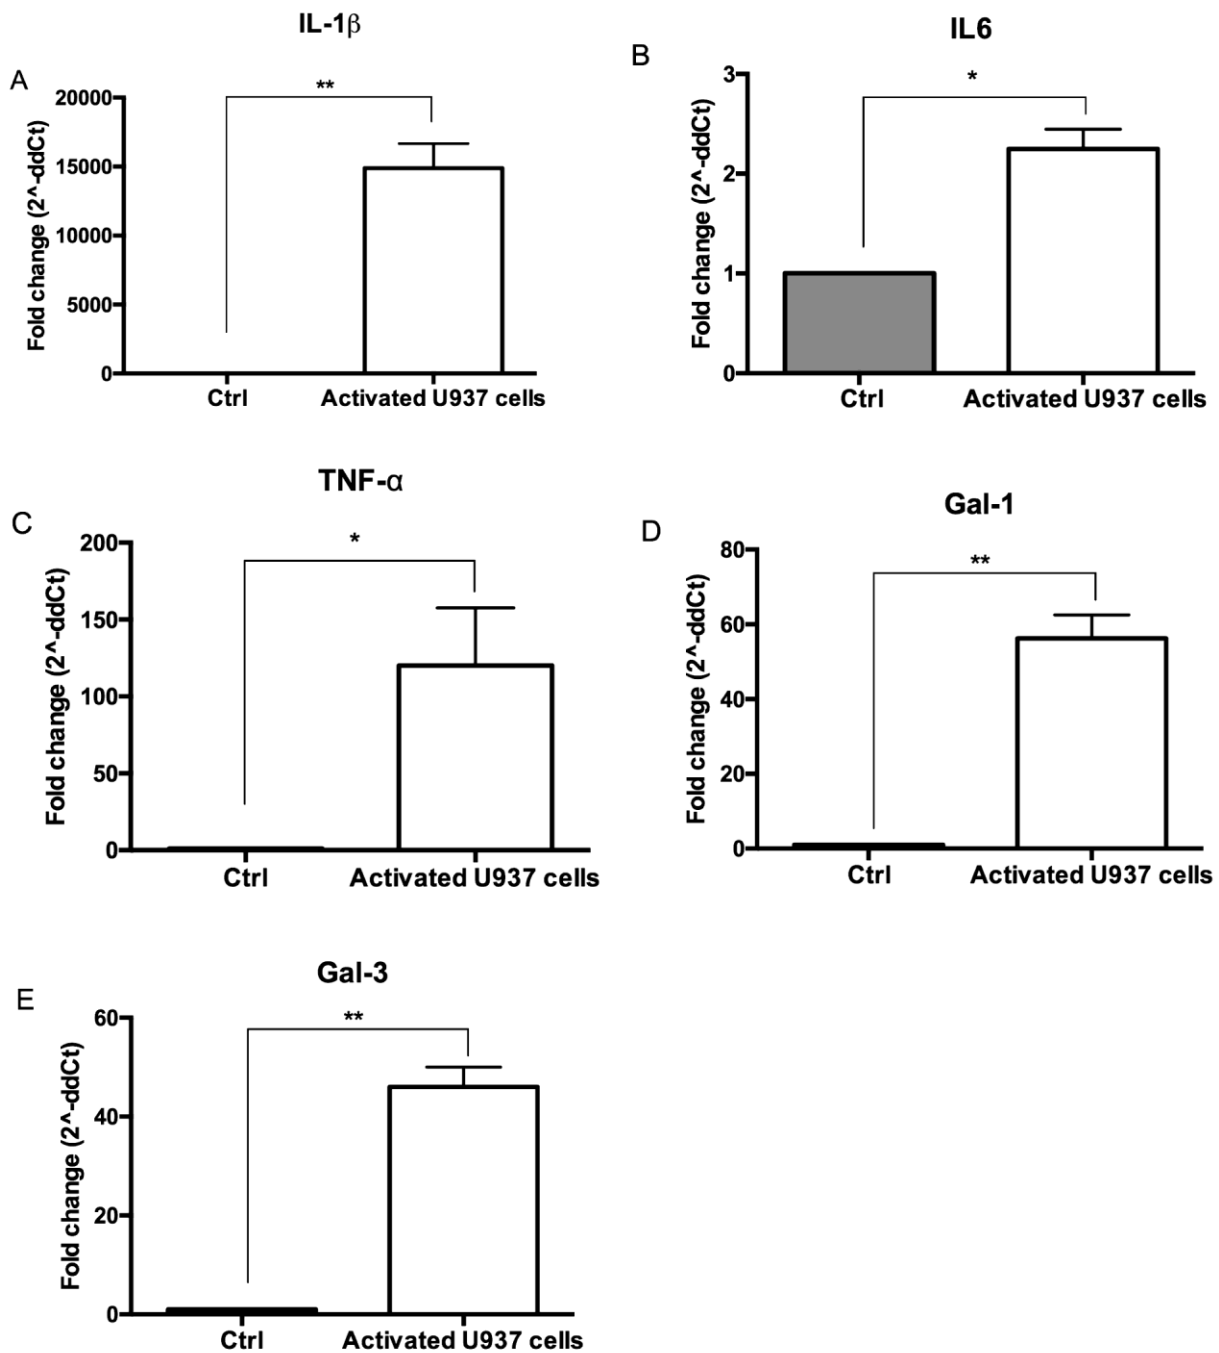

**Supplementary Figure S1. Pro-inflammatory cytokines expression of activated U937 cells.** Human monocytes U937 were differentiated in adherent macrophages by treatment with 50 ng/ml PMA for 48 h and 1  $\mu$ g/ml LPS, Sigma for 1 h. RNA transcript level for A) IL-1 $\beta$ , B) TNF $\alpha$ , C) IL-6, D) Gal-1, E) Gal-3 was analysed by qPCR. Data are expressed as mean  $\pm$  SE obtained from three experiments. \*P<0.05 and \*\*P<0.01 vs. untreated cells.

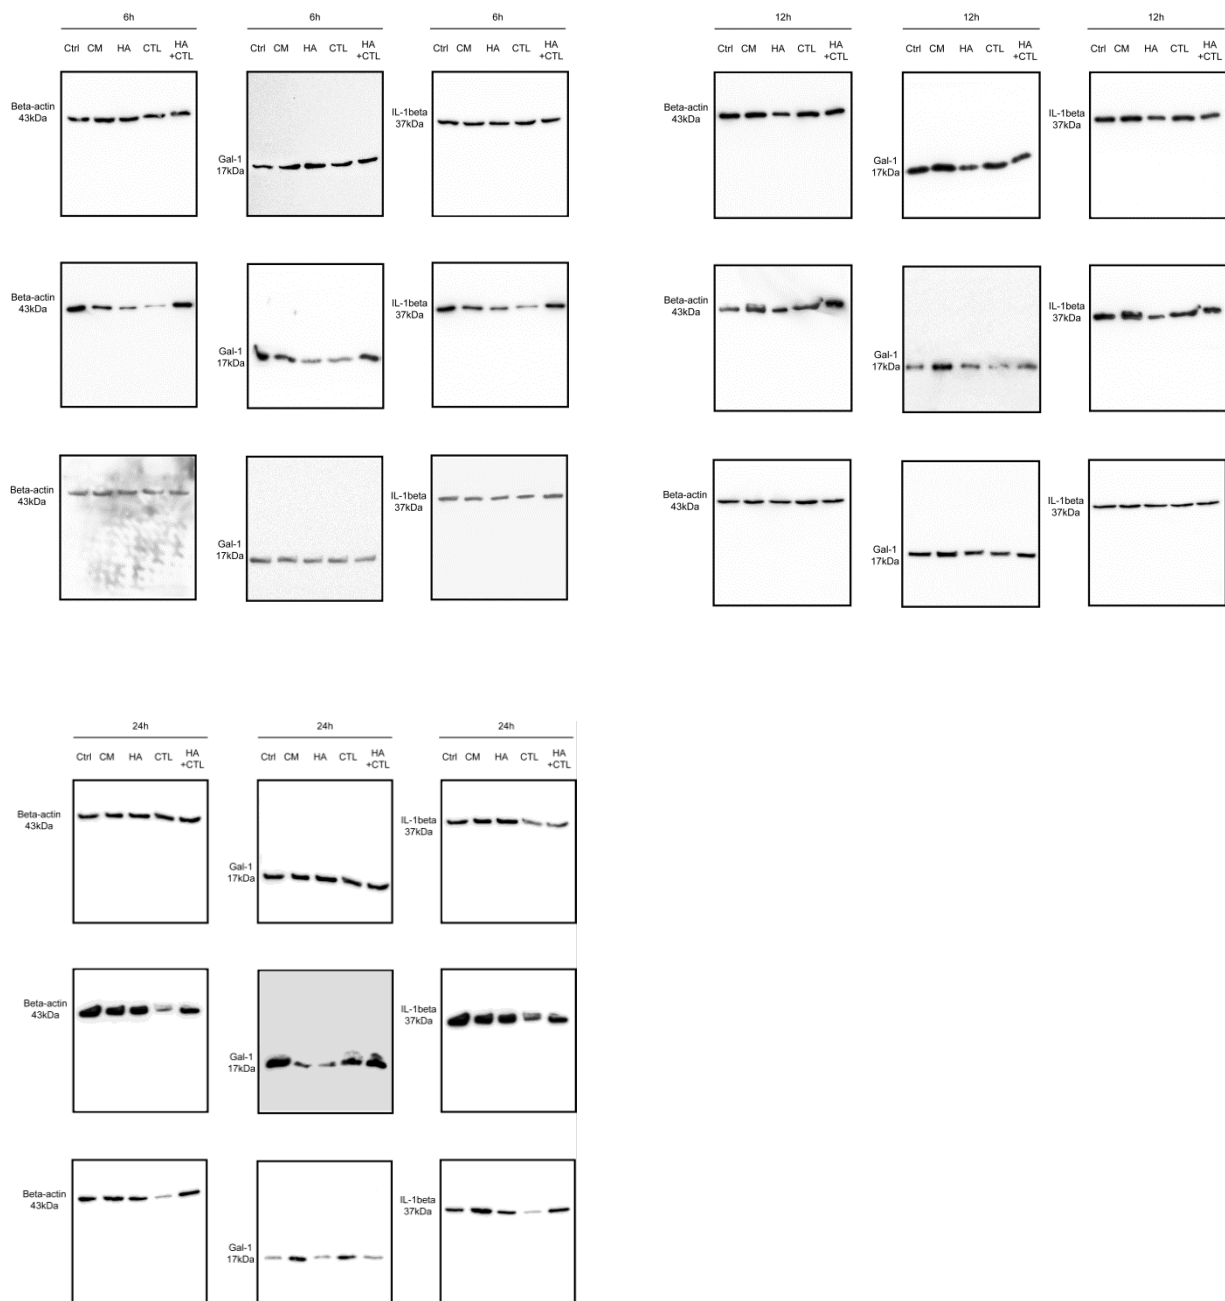

**Supplementary Figure S2. Full images of immunoblots for Figure 5B and Figure 5C**
